# Supplementary material for: Two-Dimensional β-MnO2 Nanowire Network with Enhanced Electrochemical Capacitance
Source: PubMed Central journal article supplement — Sci Rep. 2013 Jul 12;3:2193. doi: 10.1038/srep02193 (PMC3709167; doi:10.1038/srep02193), 2013-07-12
Supplement: srep02193-s1.pdf [file srep02193-s1.pdf]

## Supplementary Information (SI)

# Two-Dimensional $\beta$ -MnO<sub>2</sub> Nanowire Network with Enhanced Electrochemical Capacitance

Chengzhen Wei, Huan Pang, Bo Zhang, Qingyi Lu, Shuang Liang, Feng Gao

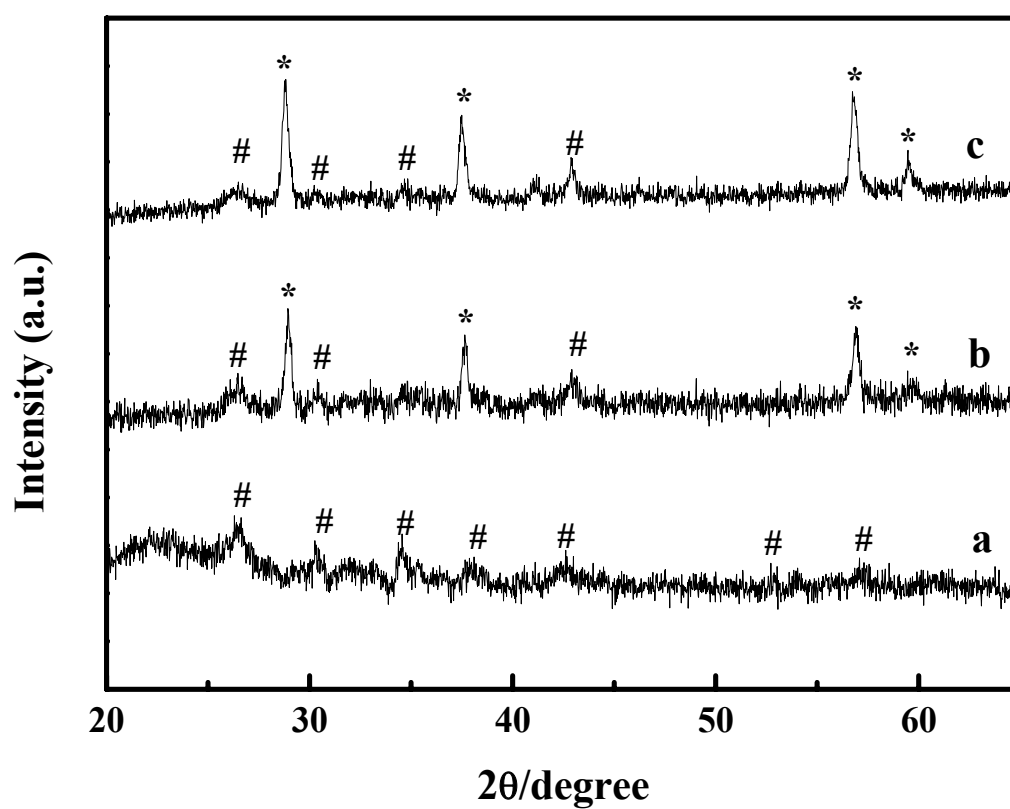

Supplementary Figure S1 XRD patterns of the products prepared under hydrothermal conditions at 220 °C for different times: (a) 0 h; (b) 1 h and (c) 4 h (“\*” is for  $\beta\text{-MnO}_2$  and “#” is for  $\text{Mn}_3(\text{PO}_4)_2$ ).

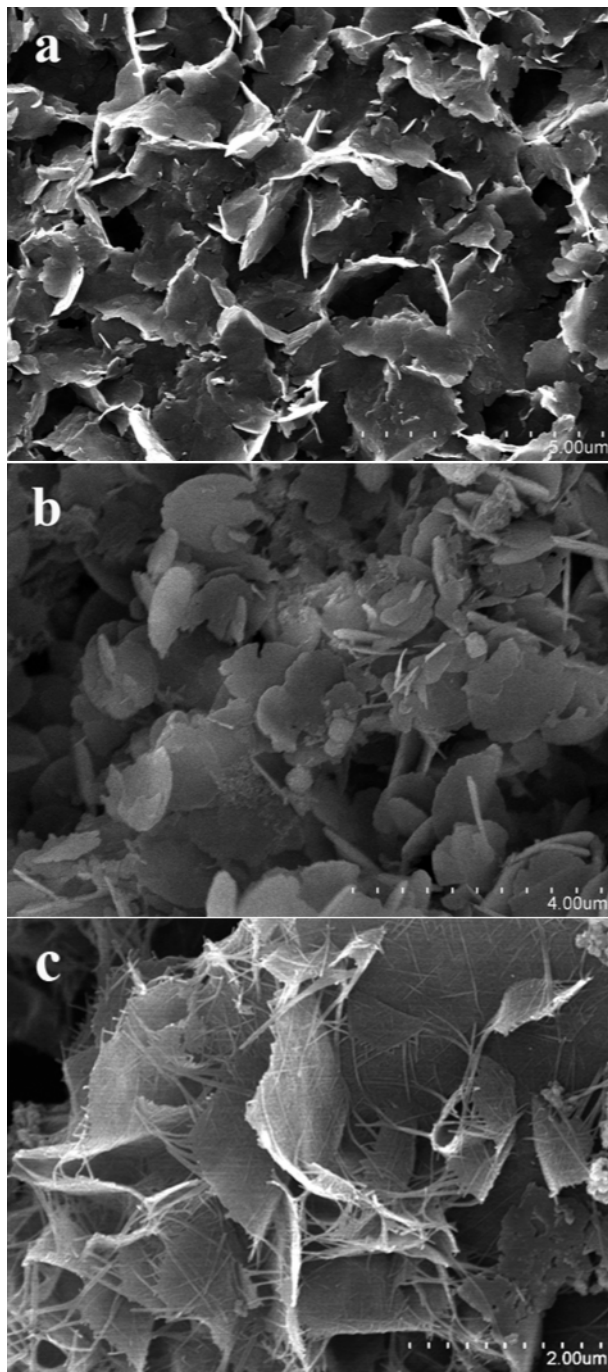

Supplementary Figure S2 SEM images of the products prepared under hydrothermal conditions at 220 °C for different times: (a) 0 h; (b) 1 h and (c) 4 h.

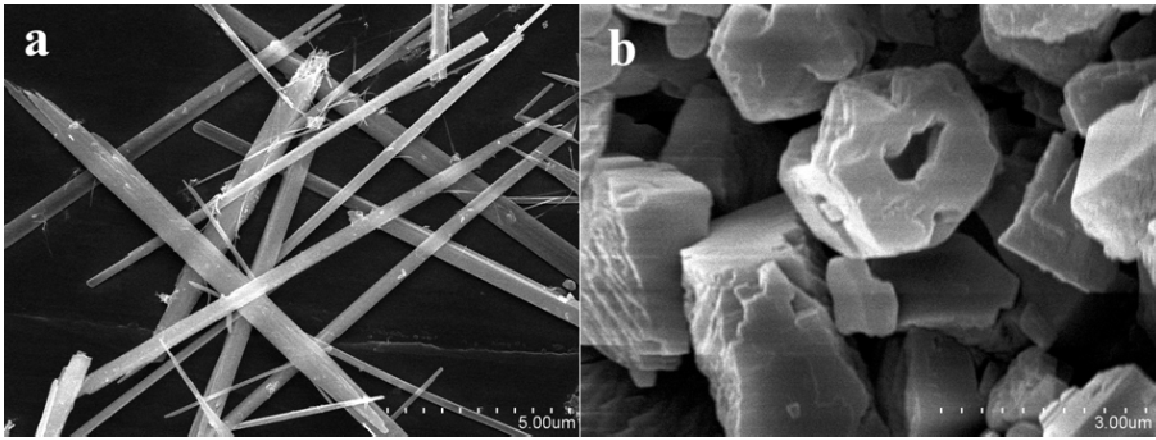

Supplementary Figure S3 SEM images of  $\beta$ -MnO<sub>2</sub> prepared according to references 27 and 28.

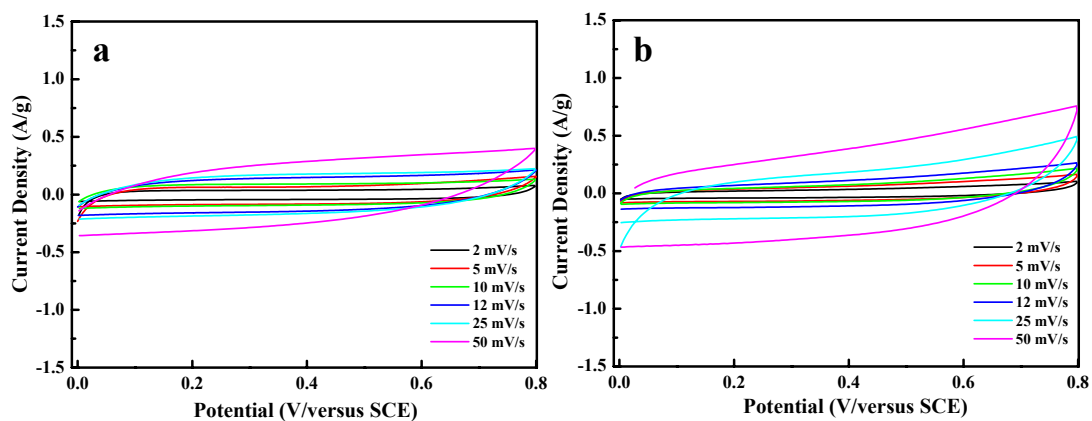

Supplementary Figure S4 CV curves of (a) M-2 and (b) M-3 electrodes at scan rates of 2, 5, 10, 12, 25 and 50 mV/s with potential windows ranging from 0 to 0.8 V versus Hg/HgCl<sub>2</sub> in 1 M Na<sub>2</sub>SO<sub>4</sub> aqueous solution.

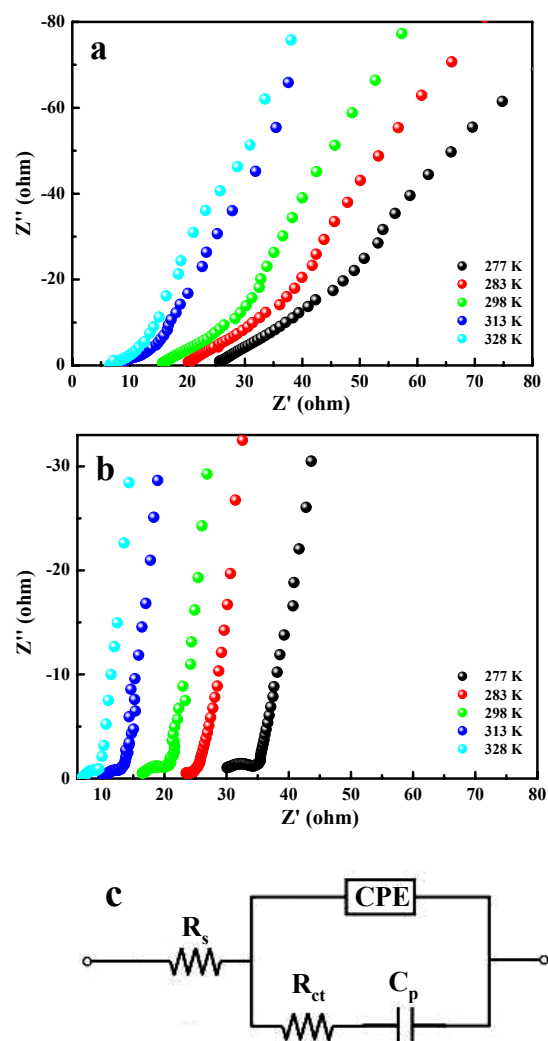

Supplementary Figure S5 Electrochemical impedance spectra of (a) M-2 and (b) M-3 electrodes at different temperatures; (c) the equivalent circuit diagram from EIS analysis.
